# Supplementary material for: Food Co-Operatives: A Potential Community-Based Strategy to Improve Fruit and Vegetable Intake in Australia
Source: Int J Environ Res Public Health. 2020 Jun 10;17(11):4154. doi: 10.3390/ijerph17114154 (PMC7312496; doi:10.3390/ijerph17114154)
Supplement: Supplementary file 1 [file ijerph-17-04154-s001.pdf]

**Table S1.** Demographic Questions.

| Category                             | Question                                                                                 | Responses                                                                 |
|--------------------------------------|------------------------------------------------------------------------------------------|---------------------------------------------------------------------------|
| Age                                  | What is your age?                                                                        | 15–19                                                                     |
|                                      |                                                                                          | 20–24                                                                     |
|                                      |                                                                                          | 25–29                                                                     |
|                                      |                                                                                          | 30–34                                                                     |
|                                      |                                                                                          | 35–39                                                                     |
|                                      |                                                                                          | 40–44                                                                     |
|                                      |                                                                                          | 45–49                                                                     |
|                                      |                                                                                          | 50–54                                                                     |
|                                      |                                                                                          | 55+                                                                       |
| Gender                               | What is your gender?                                                                     | Male                                                                      |
|                                      |                                                                                          | Female                                                                    |
|                                      |                                                                                          | Prefer not to say                                                         |
| SES                                  | What is the postcode where you usually live? e.g. 2006 (Enter postcode in the box below) | Free numeral box                                                          |
| Ethnicity                            | Do you speak a language other than English at home?                                      | No, English only.                                                         |
|                                      |                                                                                          | Yes, (please specify)                                                     |
|                                      |                                                                                          | Free text box                                                             |
| Aboriginal or Torres Strait Islander | Are you of Aboriginal or Torres Strait Islander origin?                                  | Yes                                                                       |
|                                      |                                                                                          | No                                                                        |
|                                      |                                                                                          | Don't know                                                                |
| Education                            | What is the highest level of education that you have completed?                          | I didn't go to school                                                     |
|                                      |                                                                                          | Year 10 (4th form) or below                                               |
|                                      |                                                                                          | Year 12 (6th form)                                                        |
|                                      |                                                                                          | Certificate I, II, III, IV, Diploma, Advanced Diploma or Associate Degree |
|                                      |                                                                                          | Graduate Diploma or Graduate Certificate                                  |
|                                      |                                                                                          | Bachelor or Postgraduate Degree (Masters or PhD)                          |
|                                      |                                                                                          | Unsure (please describe what education you have completed)                |
|                                      |                                                                                          | Free text box                                                             |
| Marital status                       | What is your current relationship status?                                                | Married/partner                                                           |
|                                      |                                                                                          | Divorced                                                                  |
|                                      |                                                                                          | Widow/er                                                                  |
|                                      |                                                                                          | Single                                                                    |
| Offspring 1                          | Do you have any children?                                                                | Yes                                                                       |
|                                      |                                                                                          | No                                                                        |
| Offspring 2                          | If yes, how many children do you have?                                                   | Free numeral box                                                          |
| Employment 1                         | What is your current employment status?                                                  | Full time                                                                 |
|                                      |                                                                                          | Part time                                                                 |
|                                      |                                                                                          | Casual                                                                    |
|                                      |                                                                                          | Unemployed                                                                |
|                                      |                                                                                          | Retired                                                                   |
|                                      |                                                                                          | Home duties                                                               |

**Table S2.** Fruit and Vegetable Related Questions.

| Category              | Question                                                                                                                                                                                                                                 | Responses              |
|-----------------------|------------------------------------------------------------------------------------------------------------------------------------------------------------------------------------------------------------------------------------------|------------------------|
| Vegetable<br>serves 1 | How many serves of vegetables do you usually eat each day?<br><br>(The picture shows a serve of vegetables. A serve is also = ½ cup cooked vegetables, or 1 cup of salad vegetables. Include fresh, dried, frozen and tinned vegetables) | I don't eat vegetables |
|                       |                                                                                                                                                                                                                                          | Less than 1            |
|                       |                                                                                                                                                                                                                                          | serve                  |
|                       |                                                                                                                                                                                                                                          | 1 serve                |
|                       |                                                                                                                                                                                                                                          | 2 serves               |
|                       |                                                                                                                                                                                                                                          | 3 serves               |
|                       |                                                                                                                                                                                                                                          | 4 serves               |
|                       |                                                                                                                                                                                                                                          | 5 serves               |
| Vegetable<br>serves 2 | Would you say the amount of vegetables you currently eat is ...                                                                                                                                                                          | 6 or more serves       |
|                       |                                                                                                                                                                                                                                          | Too little             |
|                       |                                                                                                                                                                                                                                          | About right            |
|                       |                                                                                                                                                                                                                                          | Too much               |
| Fruit serves<br>1     | How many serves of fruit do you usually eat each day?<br><br>(The picture shows a serve of fruit. A serve is also = 1 cup of diced pieces. Include fresh, dried, frozen and tinned fruit)                                                | Don't know             |
|                       |                                                                                                                                                                                                                                          | I don't eat fruit      |
|                       |                                                                                                                                                                                                                                          | Less than 1            |
|                       |                                                                                                                                                                                                                                          | serve                  |
|                       |                                                                                                                                                                                                                                          | 1 serve                |
|                       |                                                                                                                                                                                                                                          | 2 serves               |
|                       |                                                                                                                                                                                                                                          | 3 serves               |
|                       |                                                                                                                                                                                                                                          | 4 serves               |
| Fruit serves<br>2     | Would you say the amount of fruit you currently eat is ...                                                                                                                                                                               | 5 serves               |
|                       |                                                                                                                                                                                                                                          | 6 or more serves       |
|                       |                                                                                                                                                                                                                                          | Too little             |
|                       |                                                                                                                                                                                                                                          | About right            |
|                       |                                                                                                                                                                                                                                          | Too much               |
|                       |                                                                                                                                                                                                                                          | Don't know             |
|                       |                                                                                                                                                                                                                                          |                        |

**Table S3.** Food Co-operative Questions.

| Category            | Question                                                                                                                       | Responses                                                                                                       |
|---------------------|--------------------------------------------------------------------------------------------------------------------------------|-----------------------------------------------------------------------------------------------------------------|
|                     | Are you a member of a food co-operative?                                                                                       |                                                                                                                 |
| Food co-operative 1 | (Community based groups of people who come together voluntarily to purchase fresh fruit and vegetables or other foods in bulk) | Yes<br>No                                                                                                       |
| Food co-operative 2 | If yes, how many people are in your food co-operative?                                                                         | Free numeral box<br>Don't know<br>option                                                                        |
| Food co-operative 3 | If yes, what do you normally purchase?                                                                                         | Check boxes all that apply<br>Fruit<br>Vegetables<br>Other food items                                           |
| Food co-operative 4 | If yes, how often do you pick up a food box?                                                                                   | Greater than once per week<br>Once per week<br>Once per fortnight<br>Once per month<br>Less than once per month |
| Food co-operative 5 | If yes, what dollar amount do you spend per food box? (AU\$)                                                                   | Free numeral box                                                                                                |
